# Supplementary material for: Interfacial growth behavior of SnO2 nanorods on {1120} and {1010} facets of α-Fe2O3
Source: Royal Society of Chemistry journal article supplement (doi:10.1039/c2nr31177a), 2012-01-01
Supplement: c2nr31177a.pdf [file c2nr31177a.pdf]

## Supporting Information

### Interfacial growth behavior of SnO<sub>2</sub> nanorods on {11-20} and {10-10} facets of $\alpha$ -Fe<sub>2</sub>O<sub>3</sub>

Yi-Qun Zhang, Ling-Dong Sun\*, Wei Feng, Hao-Shuai Wu, Chun-Hua Yan\*

*Beijing National Laboratory for Molecular Sciences, State Key Lab of Rare Earth Materials Chemistry and Applications, PKU-HKU Joint Lab in Rare Earth Materials and Bioinorganic Chemistry, Peking University, Beijing, 100871, China.*

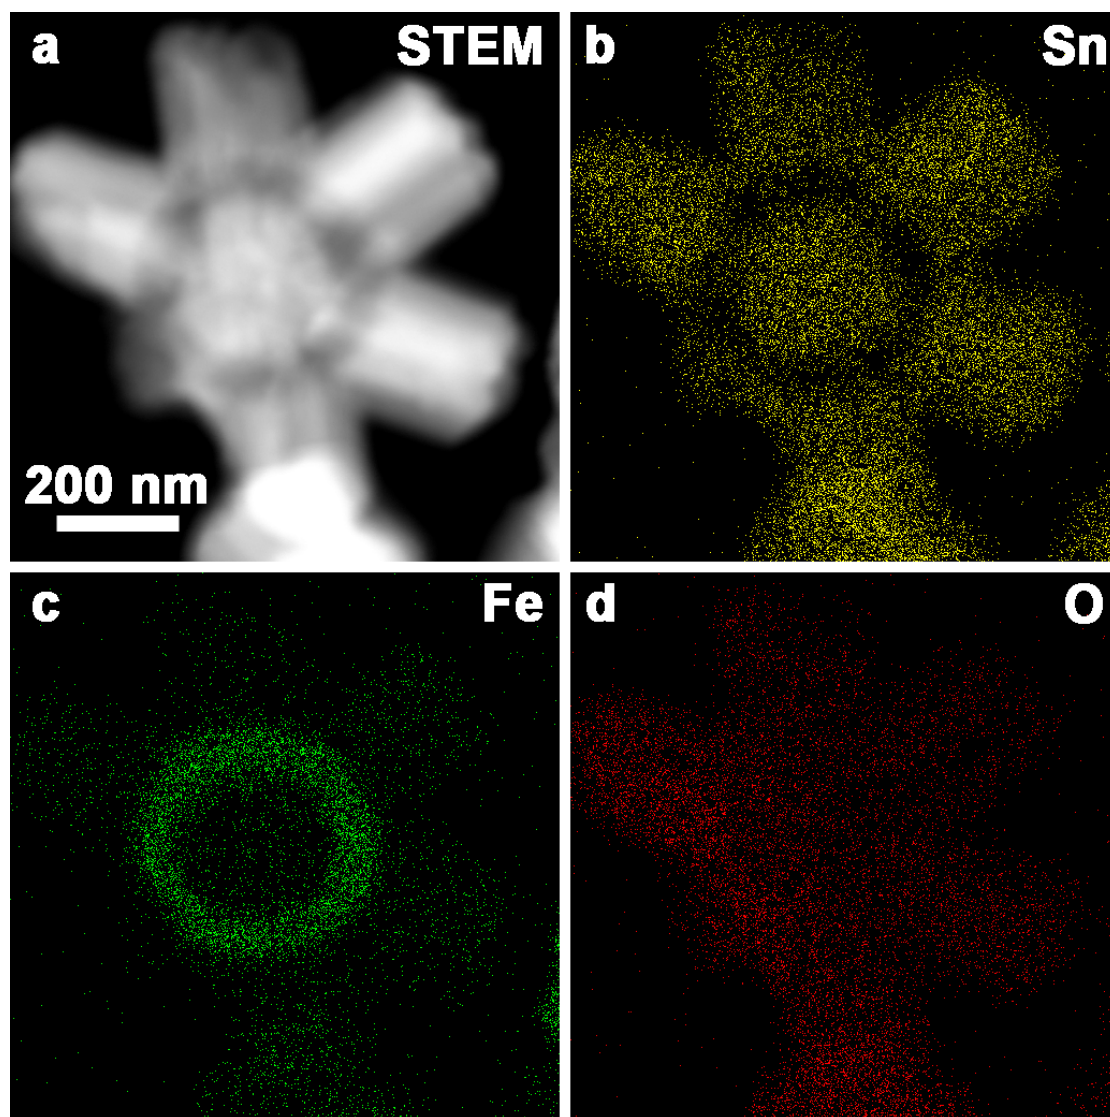

**Figure S1.** (a) STEM image of the  $\alpha$ -Fe<sub>2</sub>O<sub>3</sub>/SnO<sub>2</sub> composite; (b, c, d) element mapping results of the  $\alpha$ -Fe<sub>2</sub>O<sub>3</sub>/SnO<sub>2</sub> composite.

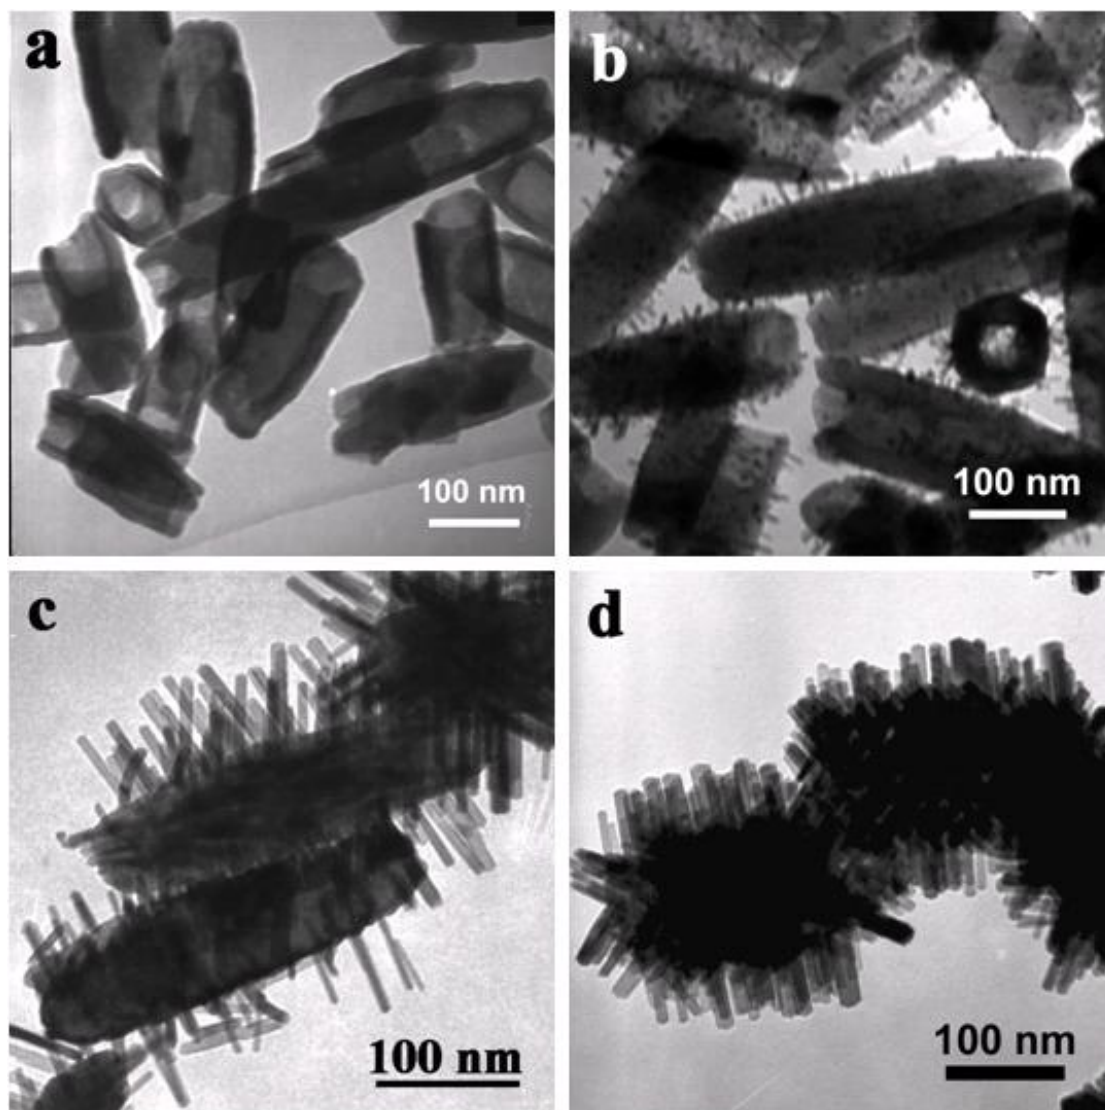

**Figure S2.** TEM images of  $\alpha\text{-Fe}_2\text{O}_3/\text{SnO}_2$  composite obtained after (a) 2 h, (b) 4 h, (c) 6 h, and (d) 9 h.

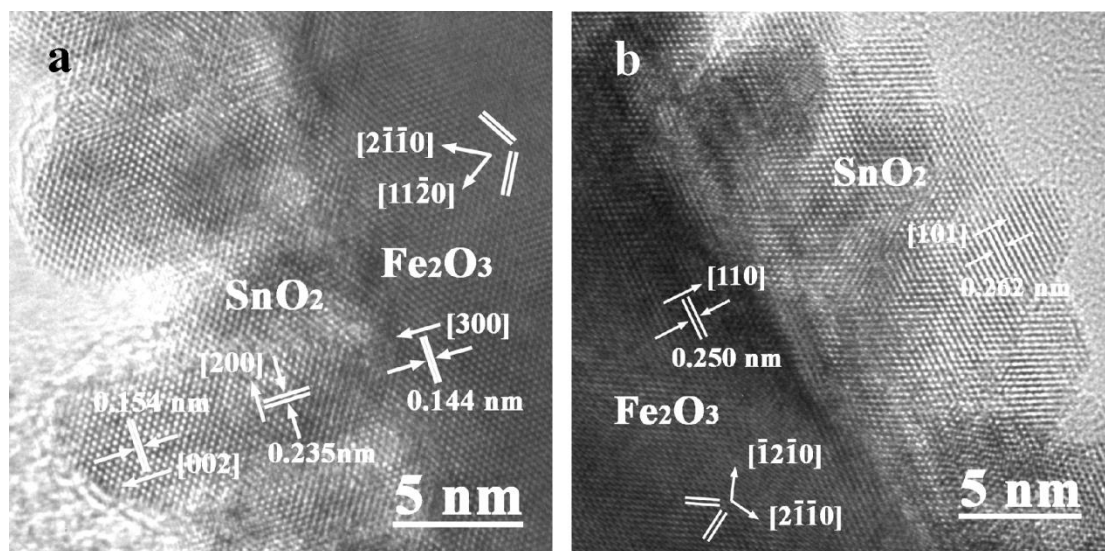

**Figure S3.** SnO<sub>2</sub> nanorods with (a) [001] and (b) [101] direction at the side surfaces of  $\alpha$ -Fe<sub>2</sub>O<sub>3</sub> nanorings.

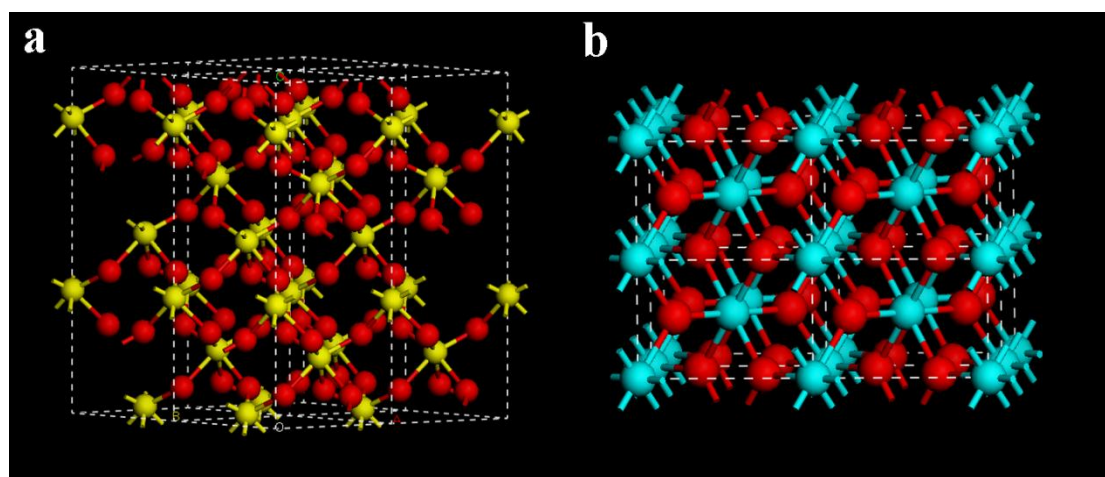

**Figure S4.** Crystal structure of (a)  $\alpha$ -Fe<sub>2</sub>O<sub>3</sub> and (b) SnO<sub>2</sub>.

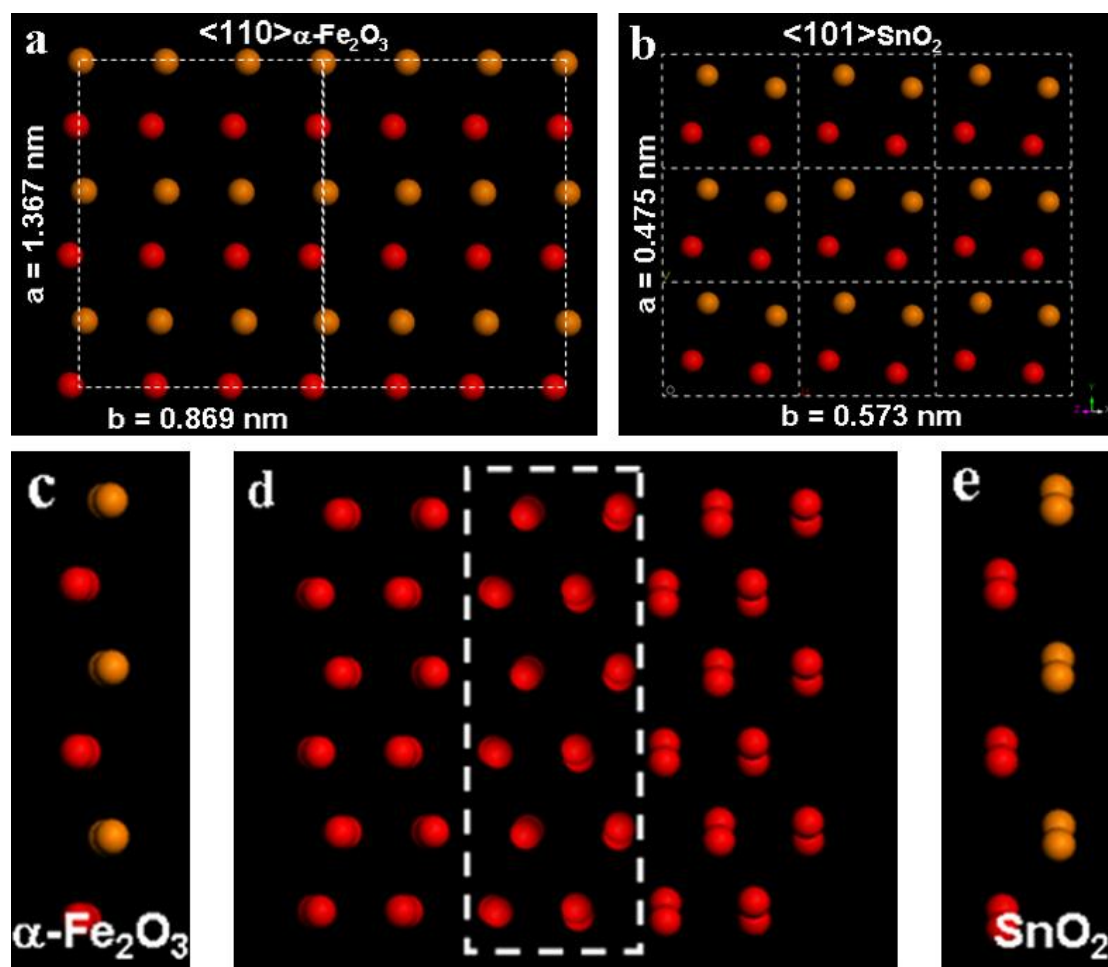

**Figure S5.** Oxygen diagram of (a) of  $\alpha\text{-Fe}_2\text{O}_3$  (11-20) plane and (b)  $\text{SnO}_2$  (101) plane, (c) side view of (a), (e) side view of (b), (d) oxygen diagram at the interface (white dotted frame) of  $\alpha\text{-Fe}_2\text{O}_3$  (left) and  $\text{SnO}_2$  (right).

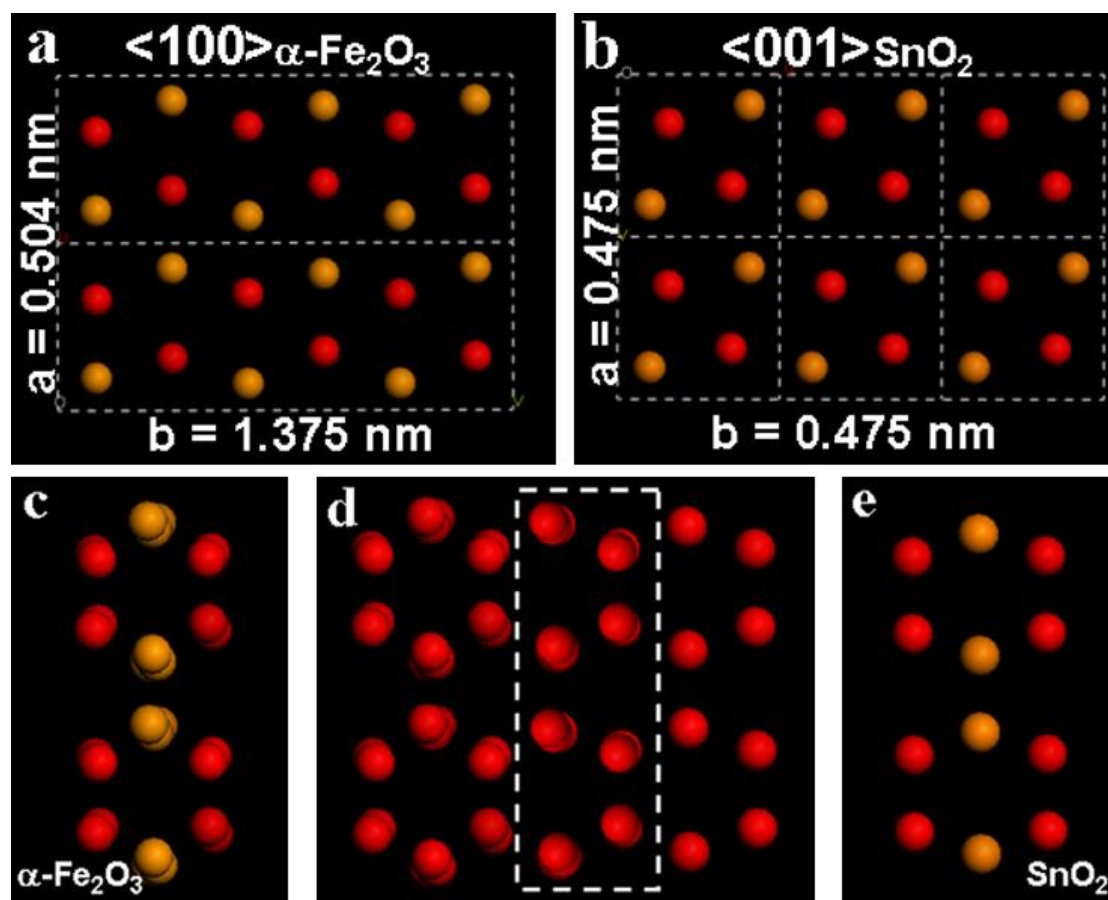

**Figure S6.** Oxygen diagram of (a) of  $\alpha\text{-Fe}_2\text{O}_3$  (10-10) plane and (b)  $\text{SnO}_2$  (001) plane, (c) side view of (a), (e) side view of (b), (d) oxygen diagram at the interface (white dotted frame) of  $\alpha\text{-Fe}_2\text{O}_3$  (left) and  $\text{SnO}_2$  (right).
